# Supplementary material
Source: publisher site journal article supplement (https://www.dovepress.com/article/479229)
Supplement: Supplementary file 1 [file get_supplementary_file.php]

Table S1. Tobacco products used by young women with ACS.

|  | ACS n=154 (26.9%) | Control n=418 (73.1%) | Total N=572 | p<0.001 |
| --- | --- | --- | --- | --- |
| Never smoker | 96 (62.3) | 317 (75.8) | 413 (72.2) |  |
| Current cigarette smoker | 40 (26) | 37 (8.9) | 77 (13.5) |  |
| Current hookah smoker | 5 (3.2) | 40 (9.6) | 45 (7.9) |  |
| Current e-cigarette smoker | 2 (1.3) | 12 (2.9) | 14 (2.4) |  |
| Ex-cigarette smoker | 4 (2.6) | 3 (0.7) | 7 (1.2) |  |
| Ex-hookah smoker | 1 (0.6) | 1 (0.2) | 2 (0.3) |  |
| Ex-tobacco user (unreported type) | 6 (3.9) | 8 (1.9) | 14 (2.4) |  |

Table S2. Pack-year among young women with ACS who currently smoke cigarettes.

|  | ACS n=136 (27.8%) | Control n=354 (72.2%) | Total N=490 | p<0.001 |
| --- | --- | --- | --- | --- |
| Never tobacco user | 96 (70.6) | 317 (89.5) | 413 (84.3) |  |
| Less than 0.5 py | 6 (4.4) | 4 (1.1) | 10 (2.0) |  |
| 0.5 to 5 py | 5 (3.7) | 6 (1.7) | 11 (2.2) |  |
| 6 to 10 py | 5 (3.7) | 7 (2.0) | 12 (2.4) |  |
| Over 10 py | 24 (17.6) | 20 (5.6) | 44 (9.0) |  |
| ACS, acute coronary syndrome; py, pack-year. | | | | |

Table S3. Sociodemographic and clinical characteristics of young women with STEMI or NSTE-ACS.

| Characteristic | STEMI n=56 (9.8%) | NSTE-ACS n=98 (17.1%) | Control n=418 (73.1%) | Total N=572 | p |
| --- | --- | --- | --- | --- | --- |
| Age | 46 [42─49] | 46 [42─49] | 45 [41─48] | 45 [41.5─48] | 0.012 |
| Post-secondary education | 21 (37.5) | 33 (33.7) | 233 (55.7) | 287 (50.2) | <0.001 |
| Insurance | 43 (78.2) | 75 (76.5) | 238 (56.9) | 356 (62.3) | <0.001 |
| Weight, kg | 79 [65.5─87.75] | 77 [68.75─90] | 75 [66─85] | 75 [67─86] | 0.271 |
| Height, cm | 160 [155─166.5] | 160 [156─165] | 161 [158─166] | 160 [158─166] | 0.581 |
| BMI, kg/m2 | 29 [25.7─33.3] | 30.1 [25.9─35.1] | 28.6 [25.4─32.9] | 28.9 [25.4─33.1] | 0.171 |
| Traditional risk factor* | 56 (100.0) | 98 (100.0) | 397 (95.0) | 551 (96.3) | 0.018 |
| Number of traditional risk factors | 3 [2─5] | 4 [3─5] | 2 [1─3] | 2 [2─4] | <0.001 |
| Obesity (BMI≥30) | 24 (42.9) | 49 (50.0) | 174 (41.6) | 247 (43.2) | 0.321 |
| Smoking history (current or ex) | 22 (39.3) | 36 (36.7) | 101 (24.2) | 159 (27.8) | 0.006 |
| Second hand smoke | 12 (21.4) | 16 (16.3) | 86 (20.6) | 114 (19.9) | 0.611 |
| Dyslipidemia‡ | 31 (88.6) | 58 (89.2) | 86 (70.5) | 175 (78.8) | 0.004 |
| Total cholesterol, mg/dL‡ | 172 [156─237] | 192 [161.75─242.75] | 209.5 [180─244] | 199 [170─241] | 0.010 |
| Triglycerides, mg/dL‡ | 149.5 [98.25─247.75] | 164 [112.5─249.25] | 148.5 [101─223] | 155.5 [106.75─231.5] | 0.269 |
| LDL-C, mg/dL‡ | 110 [86─148] | 120 [92.75─148.25] | 127.5 [108─151] | 122 [100─150] | 0.089 |
| HDL-C, mg/dL‡ | 41.5 [35.75─48.25] | 41 [35─47] | 48 [40─56] | 45 [39─52] | <0.001 |
| Family history of CVD | 27 (48.2) | 55 (56.1) | 98 (23.4) | 180 (31.5) | <0.001 |
| Type 2 diabetes mellitus | 17 (30.4) | 47 (48.0) | 49 (11.7) | 113 (19.8) | <0.001 |
| Hypertension | 24 (42.9) | 59 (60.2) | 114 (27.3) | 197 (34.4) | <0.001 |
| Metabolic syndrome | 7 (12.5) | 15 (15.3) | 10 (2.4) | 32 (5.6) | <0.001 |
| Physical inactivity | 43 (76.8) | 76 (77.6) | 308 (73.7) | 427 (74.7) | 0.678 |
| Non-traditional risk factor† | 35 (62.5) | 64 (65.3) | 271 (64.8) | 370 (64.7) | 0.934 |
| Number of non-traditional risk factors | 1 [0─2] | 1 [0─2] | 1 [0─2] | 1 [0─2] | 0.589 |
| Preterm delivery | 9 (16.1) | 29 (29.6) | 70 (16.7) | 108 (18.9) | 0.012 |
| Hypertensive disorder of pregnancy | 15 (26.8) | 30 (30.6) | 95 (22.7) | 140 (24.5) | 0.241 |
| Gestational hypertension | 5 (8.9) | 17 (17.3) | 53 (12.7) | 75 (13.1) | 0.291 |
| Chronic hypertension | 6 (10.7) | 7 (7.1) | 9 (2.2) | 22 (3.8) | 0.001 |
| Preeclampsia | 4 (7.1) | 6 (6.1) | 33 (7.9) | 43 (7.5) | 0.831 |
| GDM | 5 (8.9) | 19 (19.4) | 43 (10.3) | 67 (11.7) | 0.033 |
| Persistent weight gain after delivery | 11 (19.6) | 12 (12.2) | 89 (21.3) | 112 (19.6) | 0.127 |
| Premature menopause | 4 (7.1) | 8 (8.2) | 42 (10.0) | 54 (9.4) | 0.700 |
| PCOS | 3 (5.4) | 8 (8.2) | 28 (6.7) | 39 (6.8) | 0.788 |
| Autoimmune disease | 4 (7.1) | 3 (3.1) | 17 (4.1) | 24 (4.2) | 0.463 |
| Depression | 6 (10.7) | 8 (8.2) | 36 (8.6) | 50 (8.7) | 0.851 |
| Comorbidities | | | | | |
| Heart failure | 15 (26.8) | 7 (7.1) | 2 (0.5) | 24 (4.2) | <0.001 |
| LVEF≤45% | 20 (35.7) | 7 (7.1) | 5 (1.2) | 32 (5.6) | <0.001 |
| Sleep apnea | 2 (3.6) | 4 (4.1) | 2 (0.5) | 8 (1.4) | 0.008 |
| Hypothyroidism | 6 (10.7) | 12 (12.2) | 52 (12.4) | 70 (12.2) | 0.934 |
| Previous caesarian section | 4 (7.1) | 12 (12.2) | 88 (21.1) | 104 (18.2) | 0.010 |
| Medications | | | | | |
| Aspirin | 12 (21.4) | 25 (25.5) | 36 (8.6) | 73 (12.8) | <0.001 |
| Dual antiplatelet | 37 (66.1) | 60 (61.2) | 2 (0.5) | 99 (17.3) | <0.001 |
| Lipid lowering agent | 49 (87.5) | 90 (91.8) | 68 (16.3) | 207 (36.2) | <0.001 |
| Beta-blocker | 47 (83.9) | 80 (81.6) | 89 (21.3) | 216 (37.8) | <0.001 |
| ACEI/ARB | 27 (48.2) | 47 (48) | 68 (16.3) | 142 (24.8) | <0.001 |
| Diuretics |  |  |  |  | 0.016 |
| No | 48 (85.7) | 84 (85.7) | 386 (92.3) | 518 (90.6) |  |
| Loop diuretics | 7 (12.5) | 13 (13.3) | 28 (6.7) | 48 (8.4) |  |
| Thiazide diuretics | 0 (0.0) | 1 (1.0) | 4 (1.0) | 5 (0.9) |  |
| MRA | 1 (1.8) | 0 (0.0) | 0 (0.0) | 1 (0.2) |  |
| Oral hypoglycemic agent | 11 (19.6) | 22 (22.4) | 36 (8.6) | 69 (12.1) | <0.001 |
| Insulin | 3 (5.4) | 11 (11.2) | 2 (0.5) | 16 (2.8) | <0.001 |
| *Traditional risk factors include obesity, smoking history (current or ex-smoker), dyslipidemia, family history of CVD, type 2 diabetes mellitus, hypertension, and metabolic syndrome.  †Non-traditional risk factors included preterm delivery, hypertensive disorder of pregnancy, GDM, persistent weight gain after delivery, premature menopause, PCOS, autoimmune disease, and depression.  ‡The number of observations in STEMI, NSTE-ACS and control was n=35, n=65 and n=122 in dyslipidemia (missing=350); n=35, n=68 and n=128 in total cholesterol (missing=341); n=34, n=66 and n=122 in triglycerides (missing=350); n=35, n=66 and n=122 in LDL was (missing=349); and n=34, n=64 and n=113 in HDL (missing=361).  Continuous variables are reported as median [IQR] (min─max) and categorical variables as n (%).  ACEI, angiotensin-converting enzyme inhibitor; ARB, angiotensin-II receptor blocker; BMI, body mass index; CVD, cardiovascular disease; GDM, gestational diabetes mellitus; HDL-C, high density lipoprotein cholesterol, LDL-C, low density lipoprotein cholesterol; LVEF, left ventricular ejection fraction; MRA, mineralocorticoid receptor antagonist; NSTE-ACS, non-ST elevation acute coronary syndrome; PCOS, polycystic ovarian syndrome; STEMI, ST-segment elevation myocardial infarction. | | | | | |

Table S4. Sociodemographic and clinical characteristics of young women with NSTE-ACS with obstructive or non-obstructive coronary arteries.

| Characteristic | NSTE-ACS with obstructive CAD n=69 (13.4%) | NSTE-ACS with non-obstructive coronary arteries n=29 (5.6%) | Control n=418 (81%) | Total N=516 | p |
| --- | --- | --- | --- | --- | --- |
| Age | 46 [42─49.5] | 47 [42─49] | 45 [41─48] | 46 [41─49] | 0.030 |
| Post-secondary education | 22 (31.9) | 11 (37.9) | 233b (55.7) | 266 (51.6) | <0.001 |
| Insurance | 50 (72.5) | 25 (86.2) | 238 (56.9) | 313 (60.7) | 0.001 |
| Weight, kg | 75 [68─90] | 80 [71─90] | 75 [66─85] | 78 [68─90] | 0.188 |
| Height, cm | 160 [156.5─165.5] | 160 [155─165] | 161 [158─166] | 160 [158─165] | 0.569 |
| BMI, kg/m2 | 29.3 [25.9─34.6] | 31.2 [26─35.5] | 28.6 [25.4─32.9] | 30 [25.7─34.1] | 0.104 |
| Traditional risk factor* | 69 (100.0) | 29 (100.0) | 397 (95.0) | 495 (95.9) | 0.077 |
| Number of traditional risk factors | 4 [3─5] | 4 [3─5] | 2 [1─3] | 3 [2─4] | <0.001 |
| Obesity (BMI≥30) | 31 (44.9) | 18 (62.1) | 174 (41.6) | 223 (43.2) | 0.095 |
| Smoking history (current or ex) | 29 (42.0) | 7 (24.1) | 101 (24.2) | 137 (26.6) | 0.007 |
| Second hand smoke | 9 (13.0) | 7 (24.1) | 86 (20.6) | 102 (19.8) | 0.288 |
| Dyslipidemia‡ | 39 (86.7) | 19 (95) | 86 (70.5) | 144 (77.0) | 0.011 |
| Total cholesterol, mg/dL‡ | 188 [160.25─237] | 205.5 [176─246.75] | 209.5 [180─244] | 205 [173─240] | 0.224 |
| Triglycerides, mg/dL‡ | 147 [108─249] | 196 [151─282] | 148.5 [101─223] | 155 [106.5─226.5] | 0.181 |
| LDL-C, mg/dL‡ | 110 [91.5─144.75] | 125.5 [93.25─161] | 127.5 [108─151] | 124 [100.5─147] | 0.363 |
| HDL-C, mg/dL‡ | 40 [33─48]a | 43 [36─47] | 48 [40─56] | 45 [39─53] | <0.001 |
| Family history of CVD | 42 (60.9) | 13 (44.8) | 98 (23.4) | 153 (29.7) | <0.001 |
| Type 2 diabetes mellitus | 32 (46.4) | 15 (51.7) | 49 (11.7) | 96 (18.6) | <0.001 |
| Hypertension | 39 (56.5) | 20 (69.0) | 114 (27.3) | 173 (33.5) | <0.001 |
| Metabolic syndrome | 9 (13) | 6 (20.7) | 10 (2.4) | 25 (4.8) | <0.001 |
| Physical inactivity | 54 (78.3) | 22 (75.9) | 308 (73.7) | 384 (74.4) | 0.710 |
| Non-traditional risk factor† | 43 (62.3) | 21 (72.4) | 271 (64.8) | 335 (64.9) | 0.631 |
| Number of non-traditional risk factors | 1 [0─2] | 1 [0─2] | 1 [0─2] | 1 [0─2] | 0.239 |
| Preterm delivery | 18 (26.1) | 11 (37.9) | 70 (16.7) | 99 (19.2) | 0.006 |
| Hypertensive disorder of pregnancy | 20 (29.0) | 10 (34.5) | 95 (22.7) | 125 (24.2) | 0.220 |
| Gestational hypertension | 11 (15.9) | 6 (20.7) | 53 (12.7) | 70 (13.6) | 0.393 |
| Chronic hypertension | 5 (7.2) | 2 (6.9) | 9 (2.2) | 16 (3.1) | 0.037 |
| Preeclampsia | 4 (5.8) | 2 (6.9) | 33 (7.9) | 39 (7.6) | 0.822 |
| GDM | 13 (18.8) | 6 (20.7) | 43 (10.3) | 62 (12) | 0.043 |
| Persistent weight gain after delivery | 7 (10.1) | 5 (17.2) | 89 (21.3) | 101 (19.6) | 0.092 |
| Premature menopause | 6 (8.7) | 2 (6.9) | 42 (10.0) | 50 (9.7) | 0.820 |
| PCOS | 5 (7.2) | 3 (10.3) | 28 (6.7) | 36 (7.0) | 0.754 |
| Autoimmune disease | 2 (2.9) | 1 (3.4) | 17 (4.1) | 20 (3.9) | 0.890 |
| Depression | 6 (8.7) | 2 (6.9) | 36 (8.6) | 44 (8.5) | 0.949 |
| Comorbidities | | | | | |
| Heart failure | 6 (8.7) | 1 (3.4) | 2 (0.5) | 9 (1.7) | <0.001 |
| LVEF≤45% | 6 (8.7) | 1 (3.4) | 5 (1.2) | 12 (2.3) | 0.001 |
| Sleep apnea | 3 (4.3) | 1 (3.4) | 2 (0.5) | 6 (1.2) | 0.011 |
| Hypothyroidism | 10 (14.5) | 2 (6.9) | 52 (12.4) | 64 (12.4) | 0.581 |
| Previous caesarian section | 4 (5.8) | 8 (27.6) | 88 (21.1) | 100 (19.4) | 0.006 |
| Medications | | | | | |
| Aspirin | 14 (20.3) | 11 (37.9) | 36 (8.6) | 61 (11.8) | <0.001 |
| Dual antiplatelet | 47 (68.1) | 13 (44.8) | 2 (0.5) | 62 (12) | <0.001 |
| Lipid lowering agent | 66 (95.7) | 24 (82.8) | 68 (16.3) | 158 (30.6) | <0.001 |
| Beta-blocker | 61 (88.4) | 19 (65.5) | 89 (21.3) | 169 (32.8) | <0.001 |
| ACEI/ARB | 32 (46.4) | 15 (51.7) | 68 (16.3) | 115 (22.3) | <0.001 |
| Diuretics |  |  |  |  | 0.227 |
| No | 58 (84.1) | 26 (89.7) | 386 (92.3) | 470 (91.1) |  |
| Loop diuretics | 10 (14.5) | 3 (10.3) | 28 (6.7) | 41 (7.9) |  |
| Thiazide diuretics | 1 (1.4) | 0 (0.0) | 4 (1.0) | 5 (1.0) |  |
| Oral hypoglycemic agent | 14 (20.3) | 8 (27.6) | 36 (8.6) | 58 (11.2) | <0.001 |
| Insulin | 8 (11.6) | 3 (10.3) | 2 (0.5) | 13 (2.5) | <0.001 |
| *Traditional risk factors include obesity, smoking history (current or ex-smoker), dyslipidemia, family history of CVD, type 2 diabetes mellitus, hypertension, and metabolic syndrome.  †Non-traditional risk factors included preterm delivery, hypertensive disorder of pregnancy, GDM, persistent weight gain after delivery, premature menopause, PCOS, autoimmune disease, and depression.  ‡The number of observations in NSTE-ACS with obstructive CAD, NSTE-ACS with non-obstructive coronary arteries and control was n=45, n=20 and n=122 in dyslipidemia (missing=329); n=48, n=20 and n=128 in total cholesterol (missing=310); n=47, n=19 and n=122 in triglycerides (missing=328); n=46, n=20 and n=122 in LDL was (missing=328); and n=45, n=19 and n=113 in HDL (missing=339).  Continuous variables are reported as median [IQR] (min─max) and categorical variables as n (%).  ACEI, angiotensin-converting enzyme inhibitor; ARB, angiotensin-II receptor blocker; BMI, body mass index; CAD, coronary artery disease; CVD, cardiovascular disease; GDM, gestational diabetes mellitus; HDL-C, high density lipoprotein cholesterol, LDL-C, low density lipoprotein cholesterol; LVEF, left ventricular ejection fraction; MRA, mineralocorticoid receptor antagonist; NSTE-ACS, non-ST elevation acute coronary syndrome; PCOS, polycystic ovarian syndrome. | | | | | |

Table S5. Exercise frequency in young women with ACS.

| Exercise frequency | ACS n=154 (26.9%) | Control n=418 (73.1%) | Total N=572 | p=0.029 |
| --- | --- | --- | --- | --- |
| None | 119 (77.3) | 308 (73.7) | 427 (74.7) |  |
| Less than 3 hours/week | 3 (1.9) | 30 (7.2) | 33 (5.8) |  |
| 3 to 5 hours/week | 23 (14.9) | 69 (16.5) | 92 (16.1) |  |
| Over 5 hours/week | 9 (5.8) | 11 (2.6) | 20 (3.5) |  |
